# Supplementary material for: Shape of Testosterone
Source: PubMed Central journal article supplement (PMC8327310; doi:10.1021/acs.jpclett.1c01743), 2021-07-20
Supplement: jz1c01743_si_001.pdf [file jz1c01743_si_001.pdf]

**Supporting information for:**

## The Shape of Testosterone

I. León,<sup>\*[a]</sup> E. R. Alonso,<sup>[b][c]</sup> S. Mata,<sup>[a]</sup> J. L. Alonso<sup>[a]</sup>

<sup>a</sup>Grupo de Espectroscopía Molecular (GEM), Edificio Quifima, Laboratorios de Espectroscopia y Bioespectroscopia, Unidad Asociada CSIC, Parque Científico UVA, Universidad de Valladolid, 47011 Valladolid, Spain.

<sup>b</sup>Instituto Biofisika (UPV/EHU, CSIC), University of the Basque Country, 48940, Leioa, Spain.

<sup>b</sup>Departamento de Química Física, Facultad de Ciencia y Tecnología, Universidad del País Vasco, Barrio Sarriena s/n, 48940, Leioa, Spain.

\*Corresponding Author:

Iker León Ona, [ileon@uva.es](mailto:ileon@uva.es)

phones: +34 983 186344 / +34 983 186349

web: <http://www.gem.uva.es/>

## **METHODS**

### **Experimental details**

A commercial sample of testosterone (Cymit, >98%) was used without any further purification. A solid rod was prepared by pressing the compound's fine powder mixed with a small amount of commercial binder and was placed in the ablation nozzle. A picosecond Nd:YAG laser (20 mJ per pulse, 20 ps pulse width) was used as a vaporization tool. Products of the laser ablation were supersonically expanded using the flow of carrier gas (Ne, 8 bar) and characterized by chirped-pulse Fourier transform microwave spectroscopy (LA-CP-FTMW), using a recent constructed instrument<sup>1</sup> dedicated to maximize its performance from 1.5 to 8 GHz. This newly built spectrometer is ideal to record the rotational spectrum of large molecules such as testosterone.

### **Theoretical Modeling**

The conformational space of testosterone was first explored using fast molecular mechanics methods. *MMFFs* forcefield and two search algorithms: the “Large scales Low Mode” (which uses frequency modes to create new structures) and a Monte Carlo-based search, as implemented in Macromodel<sup>2</sup> was used, obtaining a total of 8 structures using a 30 kJ/mol energy cut off.

Geometry optimizations testosterone were done using Gaussian suite programs.<sup>3</sup> The model of choice for the main work was the density functional theory (DFT) methods<sup>4-6</sup> with Grimme dispersion corrections (GD3),<sup>7</sup> with the Pople's 6-311++G(d,p) basis set<sup>8</sup>. Frequency calculations were also computed to ensure that the optimized geometries are true minima and to calculate the Gibbs free energies.

**Fig. S1** A comparison between the two plausible configurations of testosterone. A side view of (a) structure 1 and (b) structure 4 highlighting the various dispositions of the  $\alpha$  ring. For each configuration, there are three conformers differing in the hydroxyl group's orientation.

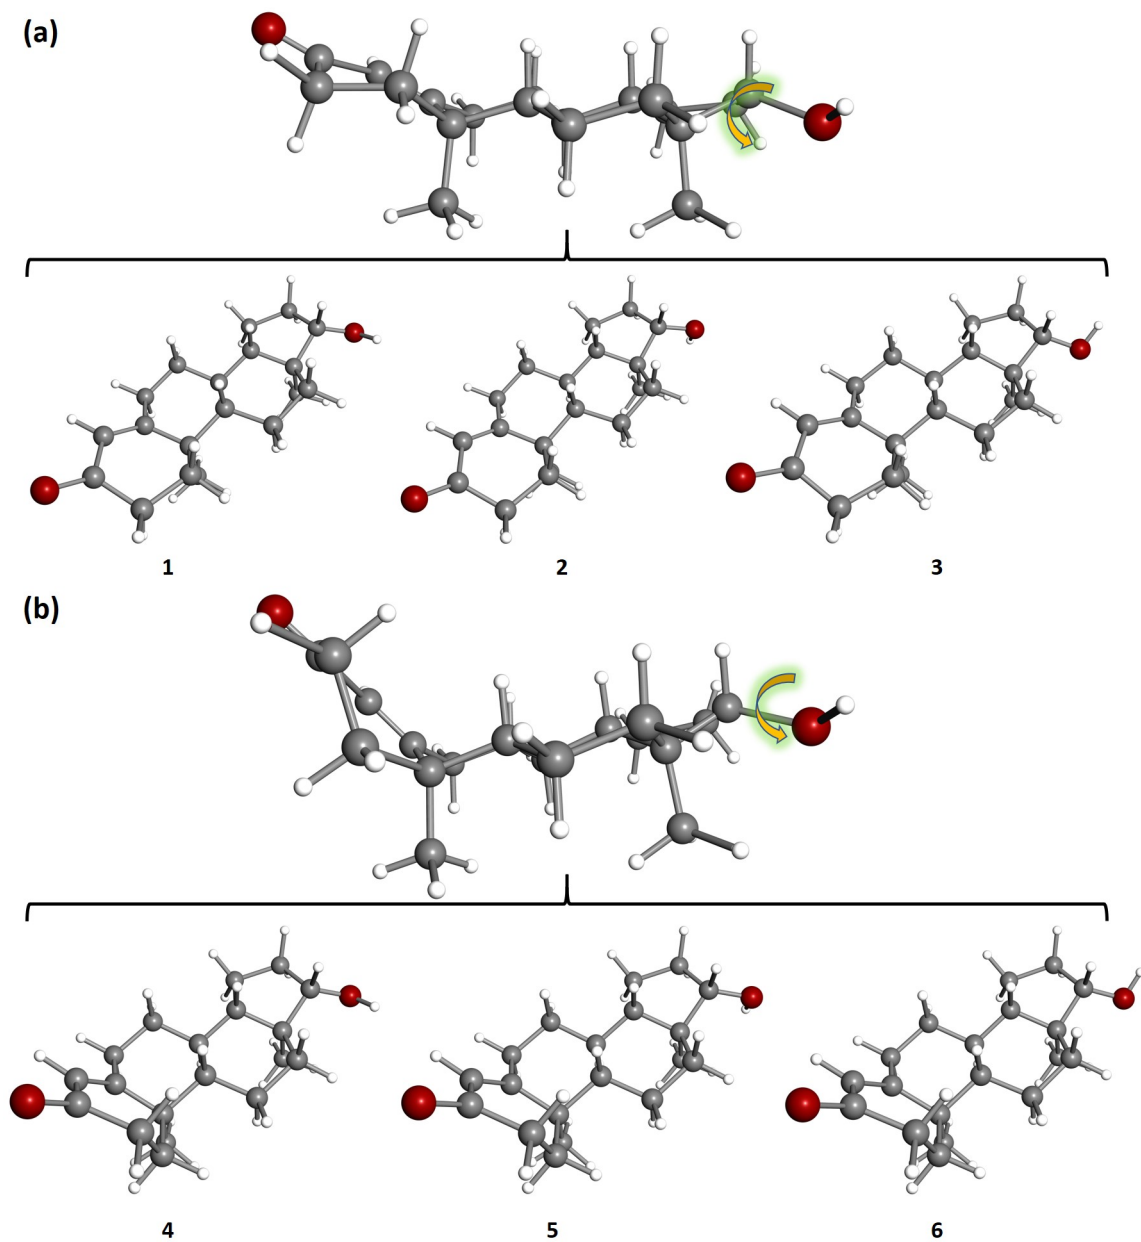

**Table S1.** Measured frequencies and residuals (in MHz) for the transitions of the testosterone's detected rotamer.

| J' | K' <sub>-1</sub> | K' <sub>+1</sub> | J'' | K'' <sub>-1</sub> | K'' <sub>+1</sub> | Vobs.    | Vobs.-V cal. |
|----|------------------|------------------|-----|-------------------|-------------------|----------|--------------|
| 5  | 0                | 5                | 4   | 0                 | 4                 | 1606.595 | -0.008       |
| 5  | 2                | 4                | 4   | 2                 | 3                 | 1611.342 | -0.007       |
| 5  | 2                | 3                | 4   | 2                 | 2                 | 1616.718 | 0.020        |
| 5  | 1                | 4                | 4   | 1                 | 3                 | 1648.112 | 0.002        |
| 6  | 1                | 6                | 5   | 1                 | 5                 | 1887.432 | 0.006        |
| 6  | 0                | 6                | 5   | 0                 | 5                 | 1925.030 | -0.003       |
| 6  | 2                | 5                | 5   | 2                 | 4                 | 1933.104 | -0.020       |
| 6  | 5                | 1                | 5   | 5                 | 0                 | 1934.981 | -0.030       |
| 6  | 4                | 2                | 5   | 4                 | 1                 | 1935.251 | 0.002        |
| 6  | 4                | 3                | 5   | 4                 | 2                 | 1935.251 | 0.003        |
| 6  | 3                | 4                | 5   | 3                 | 3                 | 1935.704 | -0.030       |
| 6  | 3                | 3                | 5   | 3                 | 2                 | 1935.931 | 0.030        |
| 6  | 2                | 4                | 5   | 2                 | 3                 | 1942.420 | -0.009       |
| 6  | 1                | 5                | 5   | 1                 | 4                 | 1976.955 | 0.008        |
| 4  | 1                | 3                | 3   | 0                 | 3                 | 1989.068 | -0.008       |
| 7  | 1                | 7                | 6   | 1                 | 6                 | 2201.087 | 0.020        |
| 7  | 0                | 7                | 6   | 0                 | 6                 | 2241.973 | 0.006        |
| 7  | 2                | 6                | 6   | 2                 | 5                 | 2254.643 | 0.005        |
| 7  | 5                | 3                | 6   | 5                 | 2                 | 2257.659 | -0.020       |
| 7  | 5                | 2                | 6   | 5                 | 1                 | 2257.659 | -0.020       |
| 7  | 4                | 3                | 6   | 4                 | 2                 | 2258.071 | 0.008        |
| 7  | 4                | 4                | 6   | 4                 | 3                 | 2258.071 | 0.010        |
| 7  | 3                | 5                | 6   | 3                 | 4                 | 2258.775 | 0.005        |
| 7  | 3                | 4                | 6   | 3                 | 3                 | 2259.143 | -0.006       |
| 7  | 2                | 5                | 6   | 2                 | 4                 | 2269.400 | 0.007        |
| 7  | 1                | 6                | 6   | 1                 | 5                 | 2305.327 | -0.001       |
| 6  | 1                | 6                | 5   | 0                 | 5                 | 2407.016 | 0.020        |
| 2  | 2                | 0                | 1   | 1                 | 0                 | 2509.989 | -0.040       |
| 8  | 1                | 8                | 7   | 1                 | 7                 | 2514.324 | 0.001        |
| 8  | 0                | 8                | 7   | 0                 | 7                 | 2557.261 | 0.005        |
| 8  | 2                | 7                | 7   | 2                 | 6                 | 2575.837 | 0.001        |
| 8  | 7                | 1                | 7   | 7                 | 0                 | 2579.939 | -0.010       |
| 8  | 6                | 2                | 7   | 6                 | 1                 | 2580.131 | 0.004        |
| 8  | 5                | 3                | 7   | 5                 | 2                 | 2580.444 | 0.020        |
| 8  | 5                | 4                | 7   | 5                 | 3                 | 2580.444 | 0.020        |
| 8  | 4                | 4                | 7   | 4                 | 3                 | 2581.005 | 0.001        |
| 8  | 4                | 5                | 7   | 4                 | 4                 | 2581.005 | 0.009        |
| 8  | 3                | 6                | 7   | 3                 | 5                 | 2581.975 | 0.009        |
| 8  | 3                | 5                | 7   | 3                 | 4                 | 2582.733 | 0.010        |
| 8  | 2                | 6                | 7   | 2                 | 5                 | 2597.685 | -0.001       |
| 7  | 1                | 7                | 6   | 0                 | 6                 | 2683.045 | 0.010        |

**Table S1.** Cont.

| J' | K'_{-1} | K'_{+1} | J'' | K''_{-1} | K''_{+1} | Vobs.    | Vobs.-V cal. |
|----|---------|---------|-----|----------|----------|----------|--------------|
| 6  | 1       | 5       | 5   | 0        | 5        | 2720.653 | 0.001        |
| 3  | 2       | 1       | 2   | 1        | 1        | 2818.576 | 0.030        |
| 9  | 1       | 9       | 8   | 1        | 8        | 2827.164 | 0.005        |
| 9  | 0       | 9       | 8   | 0        | 8        | 2870.828 | -0.001       |
| 9  | 2       | 8       | 8   | 2        | 7        | 2896.682 | 0.002        |
| 9  | 7       | 2       | 8   | 7        | 1        | 2902.618 | 0.030        |
| 9  | 6       | 4       | 8   | 6        | 3        | 2902.863 | 0.020        |
| 9  | 6       | 3       | 8   | 6        | 2        | 2902.863 | 0.020        |
| 9  | 5       | 4       | 8   | 5        | 3        | 2903.274 | 0.008        |
| 9  | 5       | 5       | 8   | 5        | 4        | 2903.274 | 0.008        |
| 9  | 4       | 5       | 8   | 4        | 4        | 2904.091 | -0.003       |
| 9  | 4       | 6       | 8   | 4        | 5        | 2904.091 | 0.020        |
| 9  | 3       | 7       | 8   | 3        | 6        | 2905.318 | 0.009        |
| 9  | 3       | 6       | 8   | 3        | 5        | 2906.702 | 0.010        |
| 9  | 2       | 7       | 8   | 2        | 6        | 2927.337 | 0.004        |
| 9  | 1       | 8       | 8   | 1        | 7        | 2960.310 | 0.001        |
| 8  | 3       | 6       | 8   | 2        | 6        | 3080.756 | 0.010        |
| 7  | 3       | 5       | 7   | 2        | 5        | 3096.457 | -0.006       |
| 7  | 3       | 4       | 7   | 2        | 5        | 3097.060 | -0.040       |
| 7  | 1       | 6       | 6   | 0        | 6        | 3100.945 | -0.001       |
| 6  | 3       | 4       | 6   | 2        | 4        | 3107.086 | 0.001        |
| 6  | 3       | 3       | 6   | 2        | 4        | 3107.378 | 0.040        |
| 5  | 3       | 3       | 5   | 2        | 3        | 3113.810 | 0.020        |
| 4  | 2       | 3       | 3   | 1        | 2        | 3117.146 | 0.020        |
| 4  | 2       | 2       | 3   | 1        | 2        | 3121.158 | 0.008        |
| 7  | 3       | 5       | 7   | 2        | 6        | 3129.901 | 0.020        |
| 7  | 3       | 4       | 7   | 2        | 6        | 3130.514 | -0.001       |
| 8  | 3       | 5       | 8   | 2        | 7        | 3137.402 | 0.002        |
| 10 | 1       | 10      | 9   | 1        | 9        | 3139.562 | 0.005        |
| 10 | 0       | 10      | 9   | 0        | 9        | 3182.704 | 0.001        |
| 4  | 2       | 3       | 3   | 1        | 3        | 3206.830 | 0.020        |
| 10 | 2       | 9       | 9   | 2        | 8        | 3217.121 | -0.005       |
| 9  | 1       | 9       | 8   | 0        | 8        | 3225.273 | -0.020       |
| 10 | 7       | 4       | 9   | 7        | 3        | 3225.273 | -0.001       |
| 10 | 7       | 3       | 9   | 7        | 2        | 3225.273 | -0.001       |
| 10 | 6       | 5       | 9   | 6        | 4        | 3225.623 | 0.004        |
| 10 | 6       | 4       | 9   | 6        | 3        | 3225.623 | 0.004        |
| 10 | 5       | 5       | 9   | 5        | 4        | 3226.204 | -0.002       |
| 10 | 5       | 6       | 9   | 5        | 5        | 3226.204 | -0.002       |
| 10 | 4       | 6       | 9   | 4        | 5        | 3227.325 | -0.030       |
| 10 | 4       | 7       | 9   | 4        | 6        | 3227.325 | 0.020        |

**Table S1.** Cont.

| J' | K'_{-1} | K'_{+1} | J'' | K''_{-1} | K''_{+1} | Vobs.    | Vobs.-V cal. |
|----|---------|---------|-----|----------|----------|----------|--------------|
| 10 | 3       | 8       | 9   | 3        | 7        | 3228.799 | 0.010        |
| 10 | 3       | 7       | 9   | 3        | 6        | 3231.153 | 0.005        |
| 10 | 2       | 8       | 9   | 2        | 7        | 3258.269 | 0.001        |
| 10 | 1       | 9       | 9   | 1        | 8        | 3286.676 | -0.002       |
| 5  | 2       | 4       | 4   | 1        | 3        | 3409.598 | 0.030        |
| 5  | 2       | 3       | 4   | 1        | 3        | 3418.946 | 0.010        |
| 11 | 1       | 11      | 10  | 1        | 10       | 3451.509 | 0.001        |
| 8  | 1       | 7       | 7   | 0        | 7        | 3492.121 | -0.009       |
| 11 | 0       | 11      | 10  | 0        | 10       | 3492.992 | -0.001       |
| 10 | 1       | 10      | 9   | 0        | 9        | 3494.026 | 0.009        |
| 11 | 2       | 10      | 10  | 2        | 9        | 3537.129 | -0.005       |
| 11 | 8       | 4       | 10  | 8        | 3        | 3547.722 | 0.002        |
| 11 | 8       | 3       | 10  | 8        | 2        | 3547.722 | 0.002        |
| 11 | 7       | 5       | 10  | 7        | 4        | 3548.029 | 0.010        |
| 11 | 7       | 4       | 10  | 7        | 3        | 3548.029 | 0.010        |
| 11 | 6       | 6       | 10  | 6        | 5        | 3548.479 | 0.002        |
| 11 | 6       | 5       | 10  | 6        | 4        | 3548.479 | 0.002        |
| 11 | 5       | 6       | 10  | 5        | 5        | 3549.267 | 0.009        |
| 11 | 5       | 7       | 10  | 5        | 6        | 3549.267 | 0.010        |
| 11 | 4       | 7       | 10  | 4        | 6        | 3550.760 | -0.040       |
| 11 | 4       | 8       | 10  | 4        | 7        | 3550.760 | 0.060        |
| 11 | 3       | 9       | 10  | 3        | 8        | 3552.384 | 0.005        |
| 11 | 3       | 8       | 10  | 3        | 7        | 3556.208 | 0.020        |
| 5  | 2       | 4       | 4   | 1        | 4        | 3559.034 | 0.003        |
| 11 | 2       | 9       | 10  | 2        | 8        | 3590.328 | 0.001        |
| 11 | 1       | 10      | 10  | 1        | 9        | 3612.124 | -0.001       |
| 6  | 2       | 4       | 5   | 1        | 4        | 3713.266 | 0.010        |
| 11 | 1       | 11      | 10  | 0        | 10       | 3762.780 | -0.040       |
| 12 | 1       | 12      | 11  | 1        | 11       | 3763.027 | 0.010        |
| 12 | 0       | 12      | 11  | 0        | 11       | 3801.900 | 0.002        |
| 12 | 2       | 11      | 11  | 2        | 10       | 3856.665 | 0.001        |
| 12 | 8       | 5       | 11  | 8        | 4        | 3870.399 | -0.040       |
| 12 | 8       | 4       | 11  | 8        | 3        | 3870.399 | -0.040       |
| 12 | 7       | 6       | 11  | 7        | 5        | 3870.829 | 0.010        |
| 12 | 7       | 5       | 11  | 7        | 4        | 3870.829 | 0.010        |
| 12 | 6       | 7       | 11  | 6        | 6        | 3871.431 | 0.010        |
| 12 | 6       | 6       | 11  | 6        | 5        | 3871.431 | 0.010        |
| 12 | 5       | 7       | 11  | 5        | 6        | 3872.440 | 0.006        |
| 12 | 5       | 8       | 11  | 5        | 7        | 3872.440 | 0.009        |
| 12 | 4       | 9       | 11  | 4        | 8        | 3874.284 | -0.004       |
| 12 | 4       | 8       | 11  | 4        | 7        | 3874.493 | 0.030        |

**Table S1.** Cont.

| J' | K'-1 | K'+1 | J'' | K''-1 | K''+1 | Vobs.    | Vobs.-V cal. |
|----|------|------|-----|-------|-------|----------|--------------|
| 12 | 3    | 10   | 11  | 3     | 9     | 3876.050 | 0.002        |
| 12 | 3    | 9    | 11  | 3     | 8     | 3881.930 | -0.003       |
| 9  | 1    | 8    | 8   | 0     | 8     | 3895.160 | -0.020       |
| 6  | 2    | 5    | 5   | 1     | 5     | 3918.733 | 0.007        |
| 12 | 2    | 10   | 11  | 2     | 9     | 3923.251 | -0.006       |
| 12 | 1    | 11   | 11  | 1     | 10    | 3936.495 | -0.006       |
| 6  | 2    | 4    | 5   | 1     | 5     | 3937.472 | 0.080        |
| 7  | 2    | 6    | 6   | 1     | 5     | 3972.294 | 0.010        |
| 7  | 2    | 5    | 6   | 1     | 5     | 4005.708 | 0.008        |
| 12 | 1    | 12   | 11  | 0     | 11    | 4032.835 | -0.009       |
| 13 | 1    | 13   | 12  | 1     | 12    | 4074.082 | 0.005        |
| 3  | 3    | 0    | 2   | 2     | 0     | 4087.795 | -0.030       |
| 3  | 3    | 1    | 2   | 2     | 1     | 4088.131 | 0.040        |
| 13 | 0    | 13   | 12  | 0     | 12    | 4109.681 | 0.002        |
| 13 | 2    | 12   | 12  | 2     | 11    | 4175.680 | -0.001       |
| 13 | 10   | 4    | 12  | 10    | 3     | 4192.732 | 0.100        |
| 13 | 9    | 4    | 12  | 9     | 3     | 4192.895 | 0.020        |
| 13 | 8    | 6    | 12  | 8     | 5     | 4193.216 | 0.010        |
| 13 | 8    | 5    | 12  | 8     | 4     | 4193.216 | 0.010        |
| 13 | 7    | 7    | 12  | 7     | 6     | 4193.703 | 0.010        |
| 13 | 7    | 6    | 12  | 7     | 5     | 4193.703 | 0.010        |
| 13 | 6    | 8    | 12  | 6     | 7     | 4194.480 | 0.030        |
| 13 | 6    | 7    | 12  | 6     | 6     | 4194.480 | 0.030        |
| 13 | 5    | 8    | 12  | 5     | 7     | 4195.750 | 0.004        |
| 13 | 5    | 9    | 12  | 5     | 8     | 4195.750 | 0.009        |
| 13 | 4    | 10   | 12  | 4     | 9     | 4198.066 | 0.003        |
| 13 | 4    | 9    | 12  | 4     | 8     | 4198.381 | 0.001        |
| 13 | 3    | 11   | 12  | 3     | 10    | 4199.757 | 0.003        |
| 13 | 3    | 10   | 12  | 3     | 9     | 4208.495 | -0.002       |
| 13 | 1    | 12   | 12  | 1     | 11    | 4259.652 | -0.001       |
| 7  | 2    | 6    | 6   | 1     | 6     | 4285.961 | 0.020        |
| 8  | 2    | 6    | 7   | 1     | 6     | 4298.072 | 0.010        |
| 13 | 1    | 13   | 12  | 0     | 12    | 4305.072 | 0.050        |
| 14 | 1    | 14   | 13  | 1     | 13    | 4384.714 | -0.002       |
| 14 | 0    | 14   | 13  | 0     | 13    | 4416.620 | 0.003        |
| 14 | 2    | 13   | 13  | 2     | 12    | 4494.151 | 0.002        |
| 9  | 2    | 8    | 8   | 1     | 7     | 4506.316 | -0.002       |
| 14 | 10   | 5    | 13  | 10    | 4     | 4515.386 | 0.070        |
| 14 | 10   | 4    | 13  | 10    | 3     | 4515.386 | 0.070        |
| 14 | 9    | 6    | 13  | 9     | 5     | 4515.628 | 0.020        |
| 14 | 9    | 5    | 13  | 9     | 4     | 4515.628 | 0.020        |

**Table S1.** Cont.

| J' | K'_{-1} | K'_{+1} | J'' | K''_{-1} | K''_{+1} | Vobs.    | Vobs.-V cal. |
|----|---------|---------|-----|----------|----------|----------|--------------|
| 14 | 8       | 7       | 13  | 8        | 6        | 4516.031 | 0.005        |
| 14 | 8       | 6       | 13  | 8        | 5        | 4516.031 | 0.005        |
| 14 | 7       | 8       | 13  | 7        | 7        | 4516.654 | 0.020        |
| 14 | 7       | 7       | 13  | 7        | 6        | 4516.654 | 0.020        |
| 14 | 6       | 8       | 13  | 6        | 7        | 4517.595 | 0.008        |
| 14 | 6       | 9       | 13  | 6        | 8        | 4517.595 | 0.008        |
| 14 | 5       | 9       | 13  | 5        | 8        | 4519.192 | -0.010       |
| 14 | 5       | 10      | 13  | 5        | 9        | 4519.192 | -0.003       |
| 14 | 4       | 11      | 13  | 4        | 10       | 4522.036 | 0.001        |
| 14 | 4       | 10      | 13  | 4        | 9        | 4522.571 | -0.002       |
| 14 | 3       | 12      | 13  | 3        | 11       | 4523.448 | 0.001        |
| 14 | 3       | 11      | 13  | 3        | 10       | 4536.004 | -0.004       |
| 14 | 1       | 14      | 13  | 0        | 13       | 4580.030 | -0.030       |
| 14 | 1       | 13      | 13  | 1        | 12       | 4581.408 | -0.010       |
| 14 | 2       | 12      | 13  | 2        | 11       | 4590.436 | -0.008       |
| 9  | 2       | 7       | 8   | 1        | 7        | 4592.248 | 0.008        |
| 8  | 2       | 7       | 7   | 1        | 7        | 4660.691 | -0.010       |
| 15 | 1       | 15      | 14  | 1        | 14       | 4694.956 | 0.004        |
| 15 | 0       | 15      | 14  | 0        | 14       | 4722.989 | 0.002        |
| 5  | 3       | 2       | 4   | 2        | 2        | 4730.541 | -0.020       |
| 5  | 3       | 3       | 4   | 2        | 2        | 4730.541 | 0.060        |
| 5  | 3       | 2       | 4   | 2        | 3        | 4734.530 | -0.050       |
| 5  | 3       | 3       | 4   | 2        | 3        | 4734.530 | 0.030        |
| 10 | 2       | 9       | 9   | 1        | 8        | 4763.132 | -0.002       |
| 15 | 2       | 14      | 14  | 2        | 13       | 4812.035 | -0.005       |
| 15 | 10      | 6       | 14  | 10       | 5        | 4838.075 | 0.040        |
| 15 | 10      | 5       | 14  | 10       | 4        | 4838.075 | 0.040        |
| 15 | 9       | 7       | 14  | 9        | 6        | 4838.417 | 0.020        |
| 15 | 9       | 6       | 14  | 9        | 5        | 4838.417 | 0.020        |
| 15 | 8       | 8       | 14  | 8        | 7        | 4838.932 | 0.020        |
| 15 | 8       | 7       | 14  | 8        | 6        | 4838.932 | 0.020        |
| 15 | 7       | 9       | 14  | 7        | 8        | 4839.670 | 0.010        |
| 15 | 7       | 8       | 14  | 7        | 7        | 4839.670 | 0.010        |
| 15 | 6       | 9       | 14  | 6        | 8        | 4840.839 | 0.010        |
| 15 | 6       | 10      | 14  | 6        | 9        | 4840.839 | 0.010        |
| 15 | 5       | 10      | 14  | 5        | 9        | 4842.822 | -0.006       |
| 15 | 5       | 11      | 14  | 5        | 10       | 4842.822 | 0.020        |
| 15 | 4       | 12      | 14  | 4        | 11       | 4846.210 | 0.001        |
| 15 | 4       | 11      | 14  | 4        | 10       | 4847.075 | -0.010       |
| 15 | 3       | 13      | 14  | 3        | 12       | 4847.076 | 0.001        |
| 15 | 3       | 12      | 14  | 3        | 11       | 4864.587 | -0.002       |



**Table S1.** Cont.

| J' | K'_{-1} | K'_{+1} | J'' | K''_{-1} | K''_{+1} | Vobs.    | Vobs.-V cal. |
|----|---------|---------|-----|----------|----------|----------|--------------|
| 10 | 2       | 8       | 9   | 1        | 8        | 4890.208 | 0.008        |
| 15 | 1       | 14      | 14  | 1        | 13       | 4901.632 | -0.006       |
| 15 | 2       | 13      | 14  | 2        | 12       | 4924.003 | -0.010       |
| 16 | 1       | 16      | 15  | 1        | 15       | 5004.818 | 0.006        |
| 16 | 0       | 16      | 15  | 0        | 15       | 5029.036 | 0.007        |
| 9  | 2       | 8       | 8   | 1        | 8        | 5043.070 | 0.008        |
| 6  | 3       | 4       | 5   | 2        | 3        | 5049.528 | 0.010        |
| 6  | 3       | 3       | 5   | 2        | 3        | 5049.766 | -0.002       |
| 6  | 3       | 4       | 5   | 2        | 4        | 5058.879 | -0.001       |
| 6  | 3       | 3       | 5   | 2        | 4        | 5059.101 | -0.030       |
| 16 | 2       | 15      | 15  | 2        | 14       | 5129.325 | -0.003       |
| 16 | 10      | 6       | 15  | 10       | 5        | 5160.843 | 0.050        |
| 16 | 8       | 9       | 15  | 8        | 8        | 5161.879 | 0.020        |
| 16 | 8       | 8       | 15  | 8        | 7        | 5161.879 | 0.020        |
| 16 | 7       | 10      | 15  | 7        | 9        | 5162.779 | 0.010        |
| 16 | 7       | 9       | 15  | 7        | 8        | 5162.779 | 0.010        |
| 16 | 5       | 11      | 15  | 5        | 10       | 5166.600 | -0.020       |
| 16 | 5       | 12      | 15  | 5        | 11       | 5166.600 | 0.020        |
| 16 | 4       | 13      | 15  | 4        | 12       | 5170.579 | -0.004       |
| 16 | 3       | 14      | 15  | 3        | 13       | 5170.579 | 0.004        |
| 16 | 4       | 12      | 15  | 4        | 11       | 5171.959 | -0.006       |
| 12 | 1       | 11      | 11  | 0        | 11       | 5183.942 | -0.020       |
| 11 | 2       | 9       | 10  | 1        | 9        | 5193.845 | -0.003       |
| 16 | 3       | 13      | 15  | 3        | 12       | 5194.353 | 0.002        |
| 16 | 1       | 15      | 15  | 1        | 14       | 5220.157 | -0.010       |
| 16 | 2       | 14      | 15  | 2        | 13       | 5257.122 | -0.020       |
| 17 | 1       | 17      | 16  | 1        | 16       | 5314.329 | 0.002        |
| 17 | 0       | 17      | 16  | 0        | 16       | 5334.948 | 0.020        |
| 7  | 3       | 5       | 6   | 2        | 4        | 5365.837 | -0.020       |
| 7  | 3       | 4       | 6   | 2        | 4        | 5366.503 | 0.020        |
| 7  | 3       | 5       | 6   | 2        | 5        | 5384.532 | 0.010        |
| 7  | 3       | 4       | 6   | 2        | 5        | 5385.166 | 0.010        |
| 10 | 2       | 9       | 9   | 1        | 9        | 5433.028 | -0.002       |
| 17 | 2       | 16      | 16  | 2        | 15       | 5445.970 | -0.020       |
| 17 | 9       | 9       | 16  | 9        | 8        | 5484.139 | 0.010        |
| 17 | 9       | 8       | 16  | 9        | 7        | 5484.139 | 0.010        |
| 17 | 8       | 10      | 16  | 8        | 9        | 5484.888 | 0.020        |
| 17 | 8       | 9       | 16  | 8        | 8        | 5484.888 | 0.020        |
| 17 | 7       | 11      | 16  | 7        | 10       | 5485.969 | 0.007        |
| 17 | 7       | 10      | 16  | 7        | 9        | 5485.969 | 0.007        |
| 17 | 6       | 11      | 16  | 6        | 10       | 5487.672 | 0.002        |

**Table S1.** Cont.

| J' | K'_{-1} | K'_{+1} | J'' | K''_{-1} | K''_{+1} | Vobs.    | Vobs.-V cal. |
|----|---------|---------|-----|----------|----------|----------|--------------|
| 17 | 6       | 12      | 16  | 6        | 11       | 5487.672 | 0.003        |
| 17 | 5       | 12      | 16  | 5        | 11       | 5490.585 | -0.020       |
| 17 | 5       | 13      | 16  | 5        | 12       | 5490.585 | 0.050        |
| 17 | 3       | 15      | 16  | 3        | 14       | 5493.879 | -0.007       |
| 17 | 4       | 14      | 16  | 4        | 13       | 5495.144 | -0.006       |
| 12 | 2       | 10      | 11  | 1        | 10       | 5504.979 | -0.002       |
| 17 | 3       | 14      | 16  | 3        | 13       | 5525.370 | -0.007       |
| 17 | 1       | 16      | 16  | 1        | 15       | 5536.881 | -0.004       |
| 17 | 2       | 15      | 16  | 2        | 14       | 5589.554 | -0.010       |
| 13 | 5       | 9       | 13  | 4        | 9        | 5607.408 | -0.006       |
| 13 | 5       | 9       | 13  | 4        | 10       | 5608.059 | -0.030       |
| 12 | 5       | 7       | 12  | 4        | 8        | 5610.027 | -0.030       |
| 12 | 5       | 8       | 12  | 4        | 8        | 5610.027 | -0.030       |
| 12 | 5       | 7       | 12  | 4        | 9        | 5610.447 | 0.030        |
| 12 | 5       | 8       | 12  | 4        | 9        | 5610.447 | 0.030        |
| 11 | 5       | 6       | 11  | 4        | 7        | 5612.009 | -0.080       |
| 11 | 5       | 7       | 11  | 4        | 7        | 5612.009 | -0.080       |
| 11 | 5       | 6       | 11  | 4        | 8        | 5612.342 | 0.070        |
| 11 | 5       | 7       | 11  | 4        | 8        | 5612.342 | 0.070        |
| 10 | 5       | 5       | 10  | 4        | 7        | 5613.661 | -0.060       |
| 10 | 5       | 6       | 10  | 4        | 7        | 5613.661 | -0.050       |
| 10 | 5       | 5       | 10  | 4        | 6        | 5613.661 | 0.030        |
| 10 | 5       | 6       | 10  | 4        | 6        | 5613.661 | 0.030        |
| 9  | 5       | 4       | 9   | 4        | 6        | 5614.783 | -0.030       |
| 9  | 5       | 5       | 9   | 4        | 6        | 5614.783 | -0.030       |
| 9  | 5       | 4       | 9   | 4        | 5        | 5614.783 | 0.005        |
| 9  | 5       | 5       | 9   | 4        | 5        | 5614.783 | 0.006        |
| 8  | 5       | 3       | 8   | 4        | 5        | 5615.593 | -0.030       |
| 8  | 5       | 4       | 8   | 4        | 5        | 5615.593 | -0.030       |
| 8  | 5       | 4       | 8   | 4        | 4        | 5615.593 | -0.010       |
| 8  | 5       | 3       | 8   | 4        | 4        | 5615.593 | -0.010       |
| 7  | 5       | 2       | 7   | 4        | 4        | 5616.171 | -0.020       |
| 7  | 5       | 3       | 7   | 4        | 4        | 5616.171 | -0.020       |
| 7  | 5       | 3       | 7   | 4        | 3        | 5616.171 | -0.010       |
| 7  | 5       | 2       | 7   | 4        | 3        | 5616.171 | -0.010       |
| 6  | 5       | 2       | 6   | 4        | 2        | 5616.555 | -0.010       |
| 6  | 5       | 1       | 6   | 4        | 2        | 5616.555 | -0.010       |
| 18 | 1       | 18      | 17  | 1        | 17       | 5623.527 | -0.002       |
| 18 | 0       | 18      | 17  | 0        | 17       | 5640.828 | -0.004       |
| 4  | 4       | 0       | 3   | 3        | 0        | 5658.657 | -0.001       |
| 8  | 3       | 6       | 7   | 2        | 5        | 5678.429 | 0.001        |

**Table S1.** Cont.

| J' | K'_{-1} | K'_{+1} | J'' | K''_{-1} | K''_{+1} | Vobs.    | Vobs.-V cal. |
|----|---------|---------|-----|----------|----------|----------|--------------|
| 8  | 3       | 5       | 7   | 2        | 5        | 5679.811 | -0.005       |
| 8  | 3       | 6       | 7   | 2        | 6        | 5711.854 | 0.005        |
| 14 | 2       | 13      | 13  | 1        | 12       | 5731.814 | 0.009        |
| 18 | 2       | 17      | 17  | 2        | 16       | 5762.009 | -0.006       |
| 18 | 8       | 11      | 17  | 8        | 10       | 5807.995 | 0.040        |
| 18 | 8       | 10      | 17  | 8        | 9        | 5807.995 | 0.040        |
| 18 | 7       | 12      | 17  | 7        | 11       | 5809.255 | 0.001        |
| 18 | 7       | 11      | 17  | 7        | 10       | 5809.255 | 0.001        |
| 18 | 6       | 12      | 17  | 6        | 11       | 5811.284 | -0.001       |
| 18 | 6       | 13      | 17  | 6        | 12       | 5811.284 | 0.002        |
| 18 | 4       | 15      | 17  | 4        | 14       | 5819.897 | -0.001       |
| 18 | 4       | 14      | 17  | 4        | 13       | 5823.036 | -0.003       |
| 13 | 2       | 11      | 12  | 1        | 11       | 5825.235 | 0.010        |
| 11 | 2       | 10      | 10  | 1        | 10       | 5830.598 | -0.008       |
| 18 | 1       | 17      | 17  | 1        | 16       | 5851.713 | -0.001       |
| 18 | 3       | 15      | 17  | 3        | 14       | 5857.696 | -0.010       |
| 18 | 2       | 16      | 17  | 2        | 15       | 5921.044 | -0.003       |
| 19 | 1       | 19      | 18  | 1        | 18       | 5932.440 | -0.010       |
| 19 | 0       | 19      | 18  | 0        | 18       | 5946.817 | -0.001       |
| 5  | 4       | 1       | 4   | 3        | 1        | 5981.099 | 0.001        |
| 9  | 3       | 7       | 8   | 2        | 6        | 5986.060 | 0.008        |
| 9  | 3       | 6       | 8   | 2        | 6        | 5988.843 | 0.020        |
| 9  | 3       | 7       | 8   | 2        | 7        | 6041.330 | 0.008        |
| 19 | 2       | 18      | 18  | 2        | 17       | 6077.394 | 0.001        |
| 19 | 11      | 9       | 18  | 11       | 8        | 6128.848 | 0.040        |
| 19 | 11      | 8       | 18  | 11       | 7        | 6128.848 | 0.040        |
| 19 | 10      | 10      | 18  | 10       | 9        | 6129.372 | 0.020        |
| 19 | 10      | 9       | 18  | 10       | 8        | 6129.372 | 0.020        |
| 19 | 9       | 11      | 18  | 9        | 10       | 6130.111 | 0.030        |
| 19 | 9       | 10      | 18  | 9        | 9        | 6130.111 | 0.030        |
| 19 | 8       | 12      | 18  | 8        | 11       | 6131.127 | 0.006        |
| 19 | 8       | 11      | 18  | 8        | 10       | 6131.127 | 0.006        |
| 19 | 7       | 12      | 18  | 7        | 11       | 6132.657 | 0.009        |
| 19 | 6       | 14      | 18  | 6        | 13       | 6135.039 | 0.003        |
| 19 | 3       | 17      | 18  | 3        | 16       | 6139.670 | -0.006       |
| 19 | 4       | 16      | 18  | 4        | 15       | 6144.808 | -0.001       |
| 19 | 4       | 15      | 18  | 4        | 14       | 6149.357 | -0.010       |
| 14 | 2       | 12      | 13  | 1        | 12       | 6156.021 | 0.006        |
| 19 | 1       | 18      | 18  | 1        | 17       | 6164.621 | -0.020       |
| 19 | 3       | 16      | 18  | 3        | 15       | 6191.313 | -0.004       |
| 20 | 1       | 20      | 19  | 1        | 19       | 6241.123 | -0.008       |

**Table S1.** Cont.

| J' | K'_{-1} | K'_{+1} | J'' | K''_{-1} | K''_{+1} | Vobs.    | Vobs.-V cal. |
|----|---------|---------|-----|----------|----------|----------|--------------|
| 19 | 2       | 17      | 18  | 2        | 16       | 6251.393 | -0.010       |
| 20 | 0       | 20      | 19  | 0        | 19       | 6252.936 | -0.003       |
| 10 | 3       | 8       | 9   | 2        | 7        | 6287.478 | -0.030       |
| 10 | 3       | 7       | 9   | 2        | 7        | 6292.651 | 0.010        |
| 6  | 4       | 2       | 5   | 3        | 2        | 6303.487 | 0.040        |
| 10 | 3       | 8       | 9   | 2        | 8        | 6373.432 | 0.002        |
| 20 | 11      | 10      | 19  | 11       | 9        | 6451.672 | 0.007        |
| 20 | 11      | 9       | 19  | 11       | 8        | 6451.672 | 0.007        |
| 20 | 10      | 11      | 19  | 10       | 10       | 6452.276 | -0.020       |
| 20 | 10      | 10      | 19  | 10       | 9        | 6452.276 | -0.020       |
| 20 | 9       | 12      | 19  | 9        | 11       | 6453.226 | 0.070        |
| 20 | 9       | 11      | 19  | 9        | 10       | 6453.226 | 0.070        |
| 20 | 8       | 13      | 19  | 8        | 12       | 6454.366 | -0.002       |
| 20 | 8       | 12      | 19  | 8        | 11       | 6454.366 | -0.002       |
| 20 | 7       | 13      | 19  | 7        | 12       | 6456.151 | 0.001        |
| 20 | 7       | 14      | 19  | 7        | 13       | 6456.151 | 0.001        |
| 20 | 6       | 14      | 19  | 6        | 13       | 6458.932 | -0.010       |
| 20 | 6       | 15      | 19  | 6        | 14       | 6458.932 | -0.004       |
| 20 | 3       | 18      | 19  | 3        | 17       | 6462.013 | -0.010       |
| 20 | 5       | 16      | 19  | 5        | 15       | 6463.573 | 0.020        |
| 20 | 5       | 15      | 19  | 5        | 14       | 6463.857 | 0.001        |
| 20 | 4       | 17      | 19  | 4        | 16       | 6469.869 | 0.010        |
| 20 | 1       | 19      | 19  | 1        | 18       | 6475.702 | -0.005       |
| 20 | 4       | 16      | 19  | 4        | 15       | 6476.341 | 0.002        |
| 21 | 1       | 21      | 20  | 1        | 20       | 6549.567 | -0.030       |
| 20 | 2       | 18      | 19  | 2        | 17       | 6580.452 | -0.020       |
| 21 | 2       | 20      | 20  | 2        | 19       | 6706.190 | -0.010       |
| 11 | 3       | 9       | 10  | 2        | 9        | 6708.674 | -0.009       |
| 21 | 8       | 14      | 20  | 8        | 13       | 6777.721 | 0.020        |
| 21 | 8       | 13      | 20  | 8        | 12       | 6777.721 | 0.020        |
| 21 | 7       | 14      | 20  | 7        | 13       | 6779.763 | -0.001       |
| 21 | 7       | 15      | 20  | 7        | 14       | 6779.763 | -0.001       |
| 21 | 6       | 15      | 20  | 6        | 14       | 6783.006 | -0.001       |
| 21 | 6       | 16      | 20  | 6        | 15       | 6783.006 | 0.010        |
| 21 | 3       | 19      | 20  | 3        | 18       | 6783.920 | -0.020       |
| 21 | 1       | 20      | 20  | 1        | 19       | 6785.045 | -0.009       |
| 21 | 4       | 18      | 20  | 4        | 17       | 6795.007 | -0.001       |
| 21 | 4       | 17      | 20  | 4        | 16       | 6804.020 | -0.020       |
| 22 | 0       | 22      | 21  | 0        | 21       | 6865.666 | 0.002        |
| 21 | 2       | 19      | 20  | 2        | 18       | 6908.096 | -0.020       |
| 22 | 2       | 21      | 21  | 2        | 20       | 7019.636 | -0.020       |

**Table S1.** Cont.

| J' | K'_{-1} | K'_{+1} | J'' | K''_{-1} | K''_{+1} | Vobs.    | Vobs.-V cal. |
|----|---------|---------|-----|----------|----------|----------|--------------|
| 22 | 1       | 21      | 21  | 1        | 20       | 7092.872 | -0.010       |
| 22 | 10      | 13      | 21  | 10       | 12       | 7098.394 | 0.030        |
| 22 | 10      | 12      | 21  | 10       | 11       | 7098.394 | 0.030        |
| 22 | 9       | 14      | 21  | 9        | 13       | 7099.500 | -0.009       |
| 22 | 9       | 13      | 21  | 9        | 12       | 7099.500 | -0.009       |
| 22 | 8       | 15      | 21  | 8        | 14       | 7101.128 | 0.006        |
| 22 | 8       | 14      | 21  | 8        | 13       | 7101.128 | 0.006        |
| 22 | 7       | 15      | 21  | 7        | 14       | 7103.515 | 0.020        |
| 22 | 7       | 16      | 21  | 7        | 15       | 7103.515 | 0.020        |
| 22 | 5       | 18      | 21  | 5        | 17       | 7113.260 | -0.005       |
| 22 | 5       | 17      | 21  | 5        | 16       | 7113.960 | -0.020       |
| 22 | 4       | 19      | 21  | 4        | 18       | 7120.186 | -0.040       |
| 22 | 4       | 18      | 21  | 4        | 17       | 7132.556 | -0.008       |
| 23 | 1       | 23      | 22  | 1        | 22       | 7165.974 | -0.020       |
| 23 | 0       | 23      | 22  | 0        | 22       | 7172.244 | -0.020       |
| 22 | 3       | 19      | 21  | 3        | 18       | 7198.457 | -0.020       |
| 5  | 5       | 0       | 4   | 4        | 0        | 7229.342 | -0.010       |
| 22 | 2       | 20      | 21  | 2        | 19       | 7234.167 | -0.020       |
| 23 | 2       | 22      | 22  | 2        | 21       | 7332.490 | 0.001        |
| 23 | 1       | 22      | 22  | 1        | 21       | 7399.412 | -0.040       |
| 23 | 3       | 21      | 22  | 3        | 20       | 7426.207 | 0.010        |
| 23 | 6       | 17      | 22  | 6        | 16       | 7431.614 | -0.030       |
| 23 | 6       | 18      | 22  | 6        | 17       | 7431.614 | 0.010        |
| 23 | 5       | 18      | 22  | 5        | 17       | 7439.493 | -0.009       |
| 23 | 4       | 20      | 22  | 4        | 19       | 7445.429 | -0.030       |
| 24 | 1       | 24      | 23  | 1        | 23       | 7473.958 | -0.030       |
| 24 | 0       | 24      | 23  | 0        | 23       | 7478.972 | -0.030       |
| 23 | 3       | 20      | 22  | 3        | 19       | 7535.476 | -0.010       |
| 6  | 5       | 1       | 5   | 4        | 1        | 7551.788 | -0.030       |
| 24 | 2       | 23      | 23  | 2        | 22       | 7644.707 | -0.030       |
| 24 | 1       | 23      | 23  | 1        | 22       | 7705.068 | 0.020        |
| 25 | 1       | 25      | 24  | 1        | 24       | 7781.865 | -0.008       |
| 25 | 0       | 25      | 24  | 0        | 24       | 7785.821 | -0.040       |
| 24 | 4       | 20      | 23  | 4        | 19       | 7792.509 | -0.040       |
| 24 | 2       | 22      | 23  | 2        | 21       | 7881.103 | -0.030       |

## REFERENCES:

- (1) Bermúdez, C.; Mata, S.; Cabezas, C.; Alonso, J. L. Tautomerism in Neutral Histidine. *Angew. Chemie - Int. Ed.* **2014**, *53*, 11015–11018.
- (2) Schrödinger Release 2018-3: Maestro Schrödinger, LLC, New York, NY, 2018. Schrödinger Release 2018-3. Maestro. LLC: New York.
- (3) Frisch, M. J.; Trucks, G. W.; Schlegel, H. B.; Scuseria, G. E.; Robb, M. A.; Cheeseman, J. R.; Scalmani, G.; Barone, V.; Mennucci, B.; Petersson, G. A.; Nakatsuji, H.; Caricato, M.; Li, X.; Hratchian, H. P.; Izmaylov, A. F.; Bloino, J.; Zheng, G.; Sonnenberg, J. L.; Hada, M.; Ehara, M.; Toyota, K.; Fukuda, R.; Hasegawa, J.; Ishida, M.; Nakajima, T.; Honda, Y.; Kitao, O.; Nakai, H.; Vreven, T.; Montgomery, J. A.; Jr.; Peralta, J. E.; Ogliaro, F.; Bearpark, M.; Heyd, J. J.; Brothers, E.; Kudin, K. N.; Staroverov, V. N.; Kobayashi, R.; Normand, J.; Raghavachari, K.; Rendell, A. P.; Burant, J. C.; Iyengar, S. S.; Tomasi, J.; Cossi, M.; Rega, N.; Millam, M. J.; Klene, M.; Knox, J. E.; Cross, J. B.; Bakken, V.; Adamo, C.; Jaramillo, J.; Gomperts, R.; Stratmann, R. E.; Yazyev, O.; Austin, A. J.; Cammi, R.; Pomelli, C.; Ochterski, J. W.; Martin, R. L.; Morokuma, K.; Zakrzewski, V. G.; Voth, G. A.; Salvador, P.; Dannenberg, J. J.; Dapprich, S.; Daniels, A. D.; Farkas, Ö.; Foresman, J. B.; Ortiz, J. V.; Cioslowski, J.; Fox, D. J. *Gaussian*; Gaussian 09 Rev. D01., Gaussian, Inc., Wallingford, CT, 2012, see also: <http://www.gaussian.com>.
- (4) Becke, A. D. Density-Functional Exchange-Energy Approximation with Correct Asymptotic Behavior. *Phys. Rev. A* **1988**, *38*, 3098–3100.
- (5) Becke, A. D. A New Mixing of Hartree–Fock and Local Density-functional Theories. *J. Chem. Phys.* **1993**, *98* (2), 1372–1377. <https://doi.org/10.1063/1.464304>.
- (6) Zhao, Y.; Truhlar, D. G. Density Functionals for Noncovalent Interaction Energies of Biological Importance. *J. Chem. Theory Comput.* **2007**, *3*, 289–300.
- (7) Grimme, S.; Antony, J.; Ehrlich, S.; Krieg, H. A Consistent and Accurate Ab Initio Parametrization of Density Functional Dispersion Correction (DFT-D) for the 94 Elements H-Pu. *J. Chem. Phys.* **2010**, *132* (15).
- (8) Frisch, M. J.; Pople, J. A.; Binkley, J. S. Self-Consistent Molecular Orbital Methods 25. Supplementary Functions for Gaussian Basis Sets. *J. Chem. Phys.* **1984**, *80*, 3265–3269.
